# Supplementary material
Source: PubMed Central journal article supplement (PMC3036791)
Supplement: NIHMS255584-supplement-1_si_001.pdf [file NIHMS255584-supplement-1_si_001.pdf]

# Aquatic Self-Assembly of Sixteen Subunits into a 39-kDa Dendrimer

*Luis R. Rivera, José E. Betancourt and José M. Rivera\**

Department of Chemistry,

University of Puerto Rico at Río Piedras, San Juan, Puerto Rico, 00931

\*To whom correspondence should be addressed. Telephone: 1-787-764-0000  
ext. 2906 Fax: 787-756-8242. E-mail: jmrivortz@mac.com.

## TABLE OF CONTENTS

|                                                            |           |
|------------------------------------------------------------|-----------|
| <b>A. HIGH RESOLUTION MASS SPECTROMETRY .....</b>          | <b>2</b>  |
| <b>B. NMR SPECTRA OF THE MONOMER 3 .....</b>               | <b>4</b>  |
| <b>C. NMR SPECTRA OF 3<sub>16</sub> .....</b>              | <b>6</b>  |
| <b>D. DYNAMIC LIGHT SCATTERING (DLS) DATA .....</b>        | <b>8</b>  |
| <b>E. COMPUTATIONAL ANALYSIS .....</b>                     | <b>11</b> |
| <b>F. T<sub>M</sub> CALCULATION FROM VT-NMR DATA .....</b> | <b>12</b> |
| <b>G. REFERENCES .....</b>                                 | <b>14</b> |

## A. High Resolution Mass Spectrometry

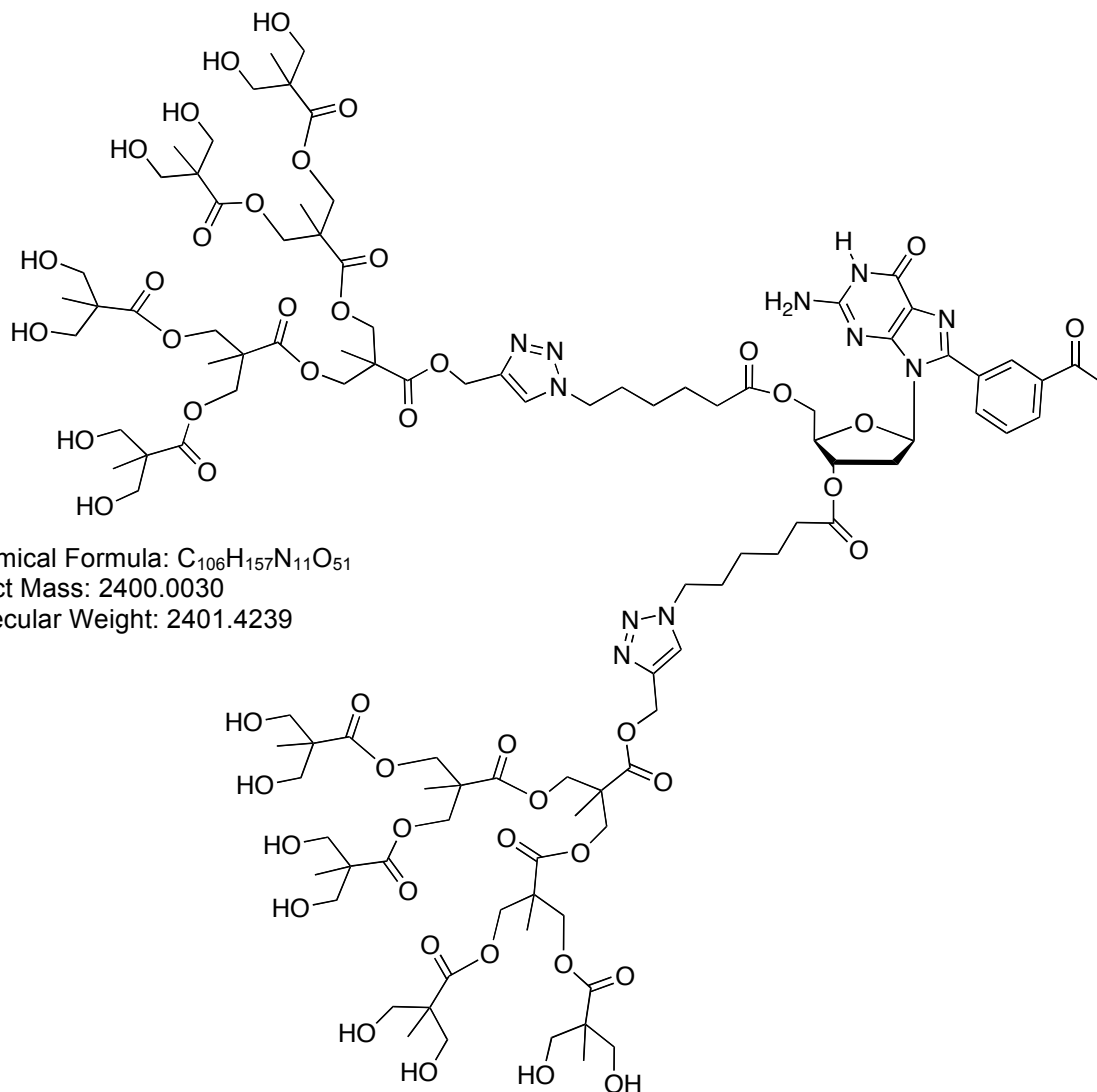

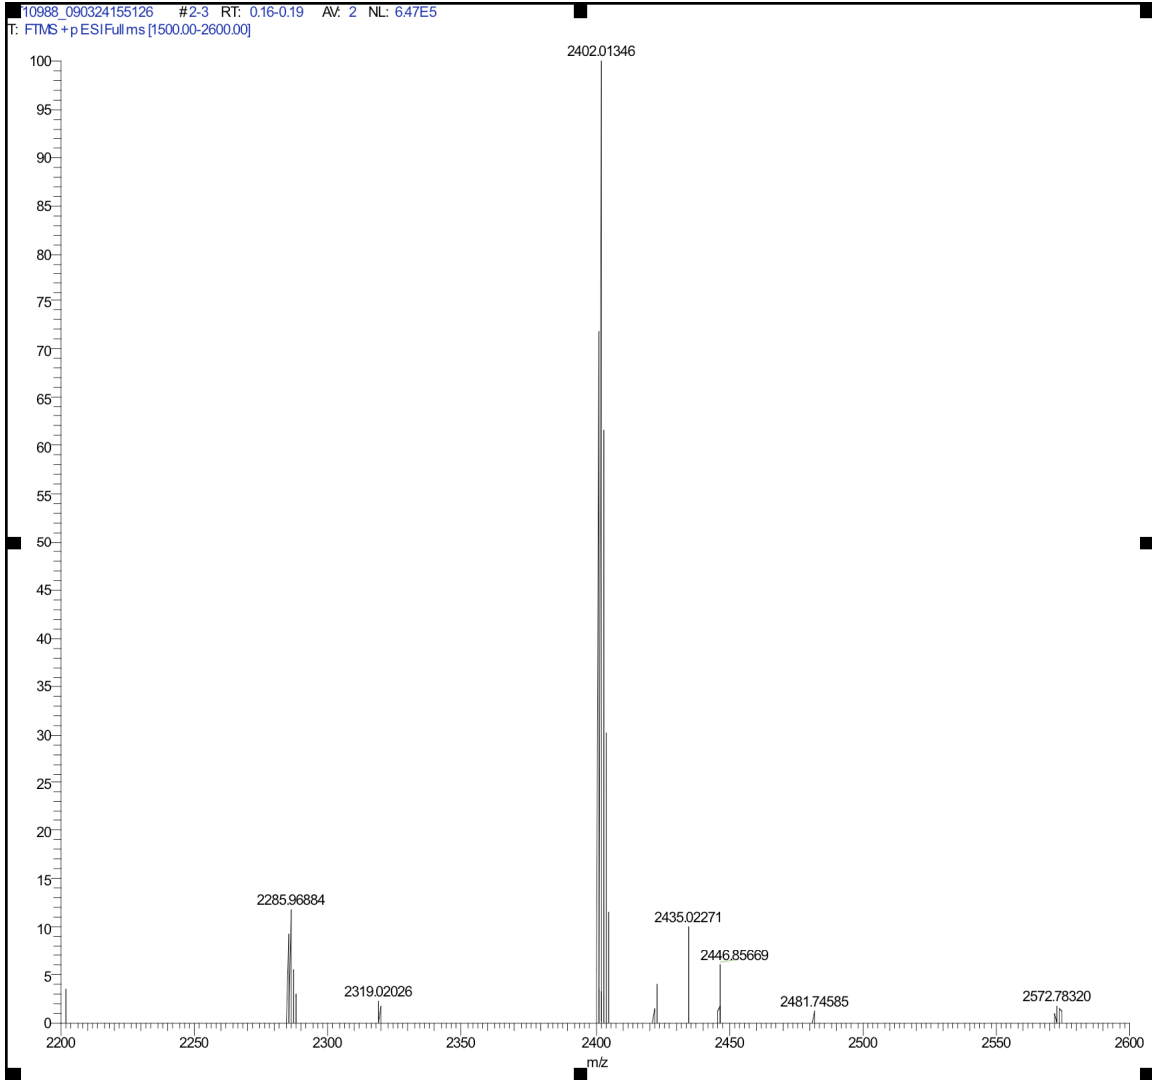

**Figure S1.** FT-MS pESI full MS [1.5-2.6 kDa] of **3**.

## B. NMR Spectra for monomer 3

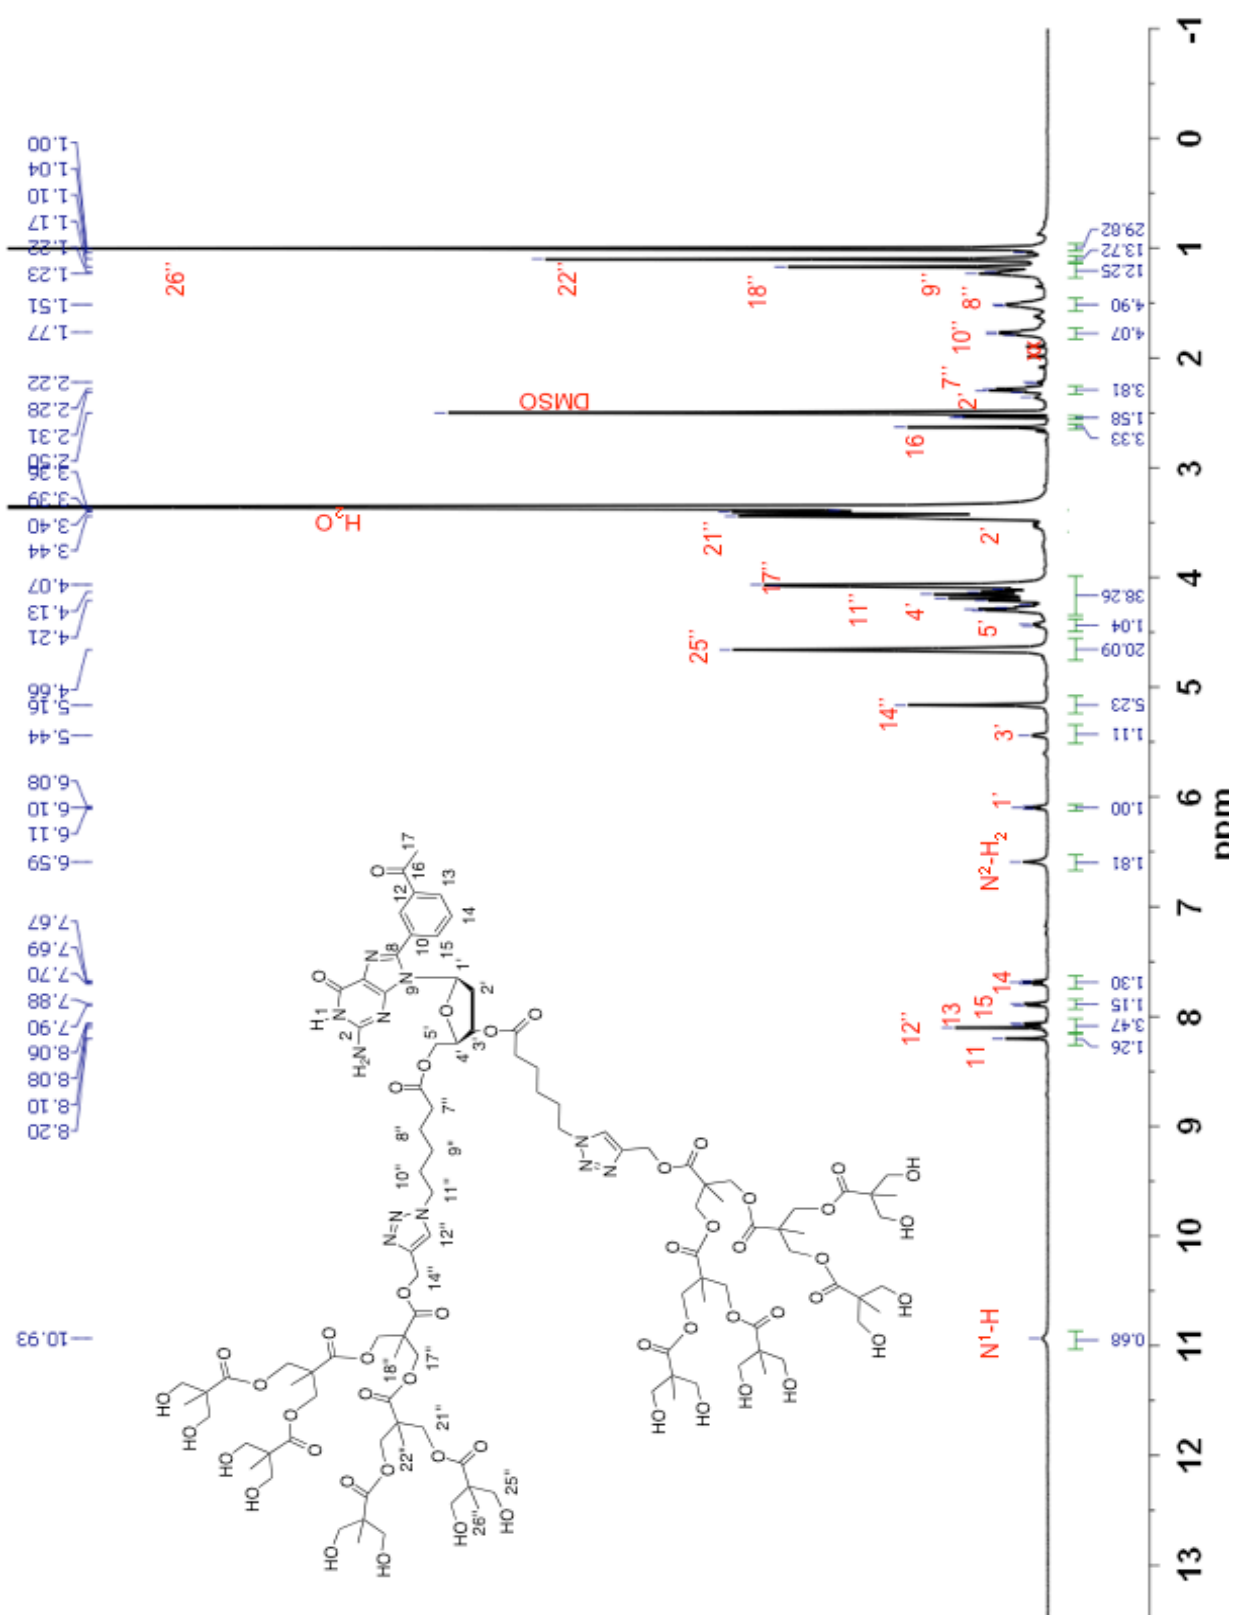

Figure S2.  $^1\text{H}$  NMR spectrum (500 MHz) of 3 in  $\text{DMSO-}d_6$ .

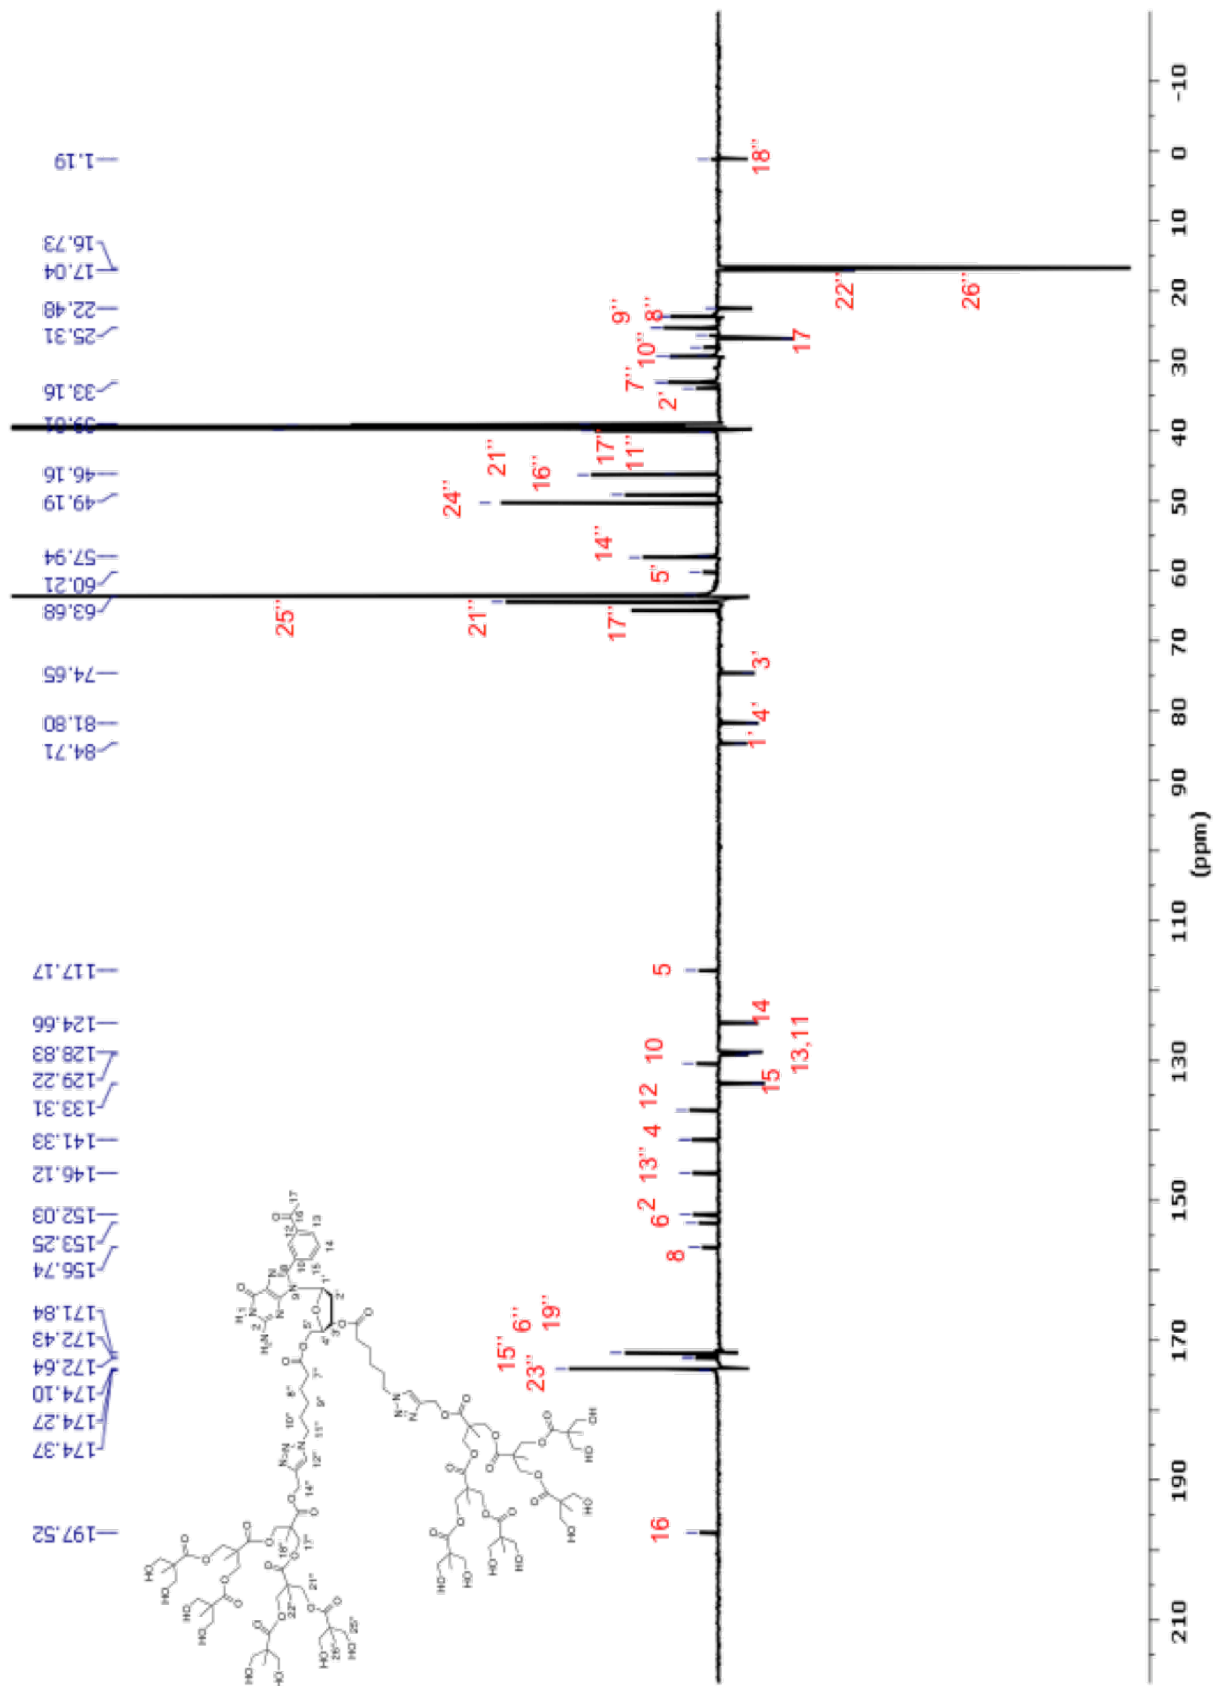

**Figure S3.**  $^{13}\text{C}$  NMR spectrum (125 MHz) of **3** in  $\text{DMSO-}d_6$ .

### C. NMR spectra for 3<sub>16</sub>

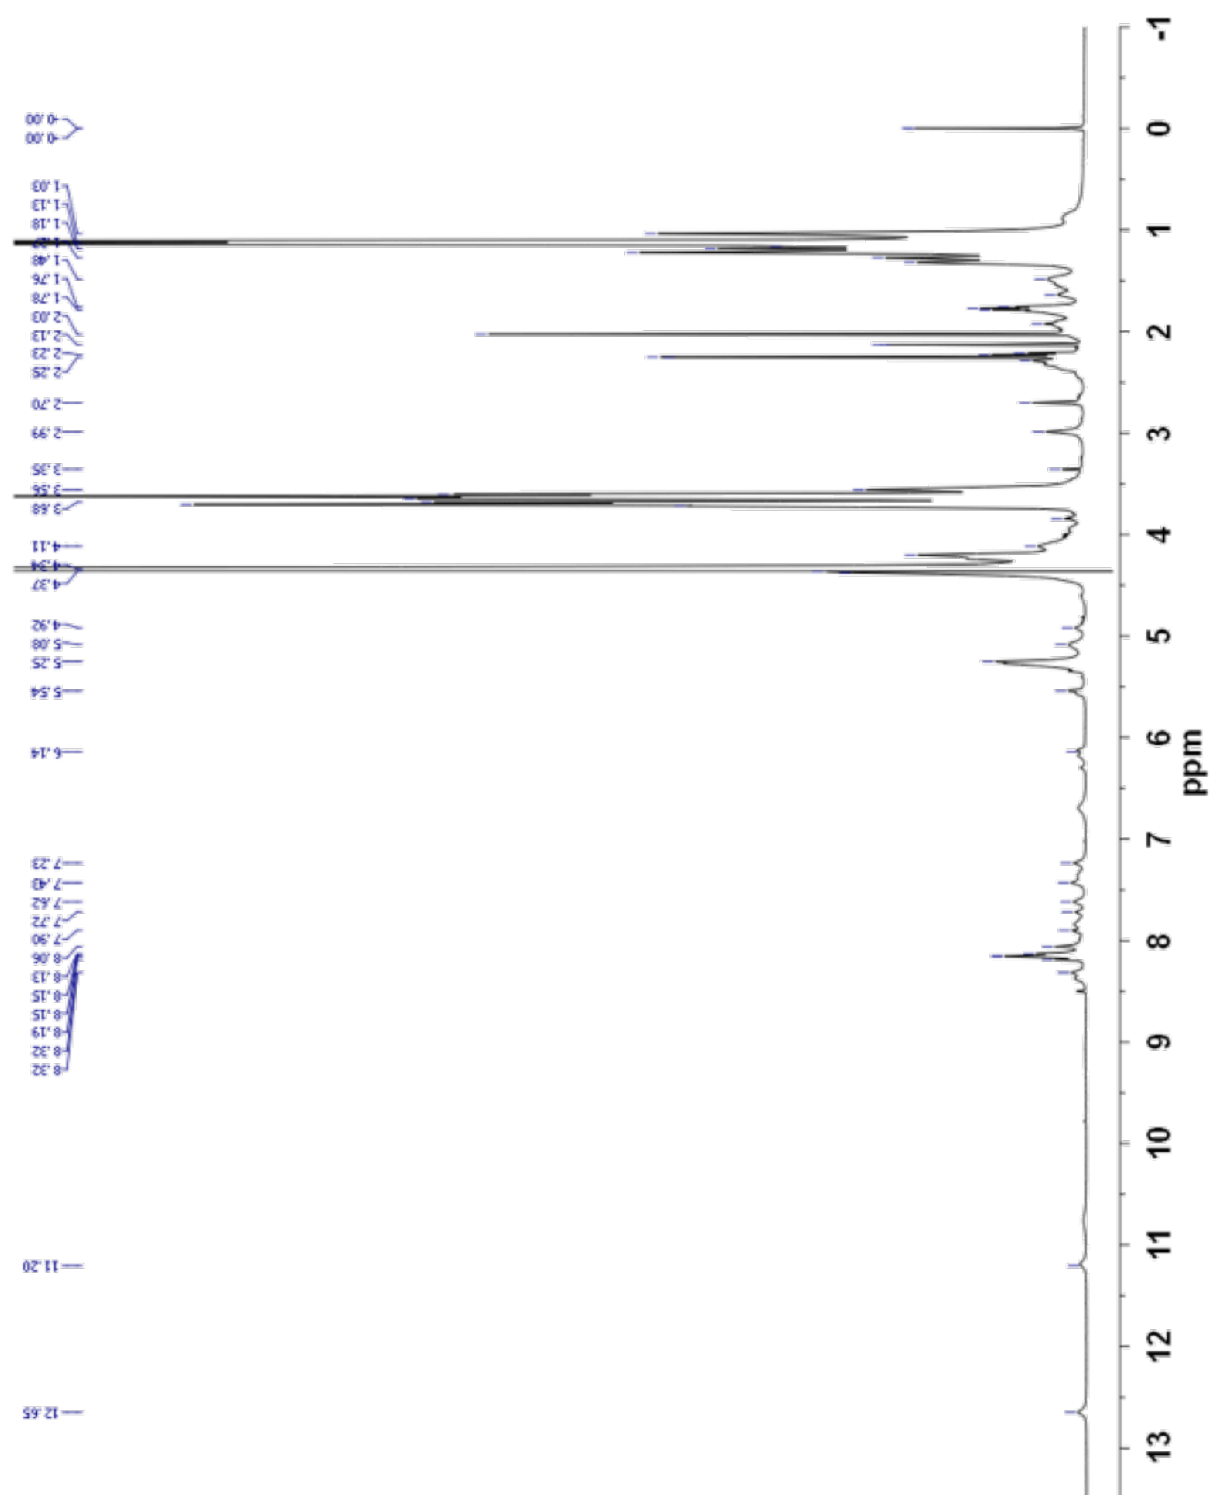

**Figure S4.** <sup>1</sup>H-NMR of 3<sub>16</sub> (500 MHz; H<sub>2</sub>O-D<sub>2</sub>O (9:1); 0.1 M PBS, pH 7.1; 3 M KI; 10 mM in 3).

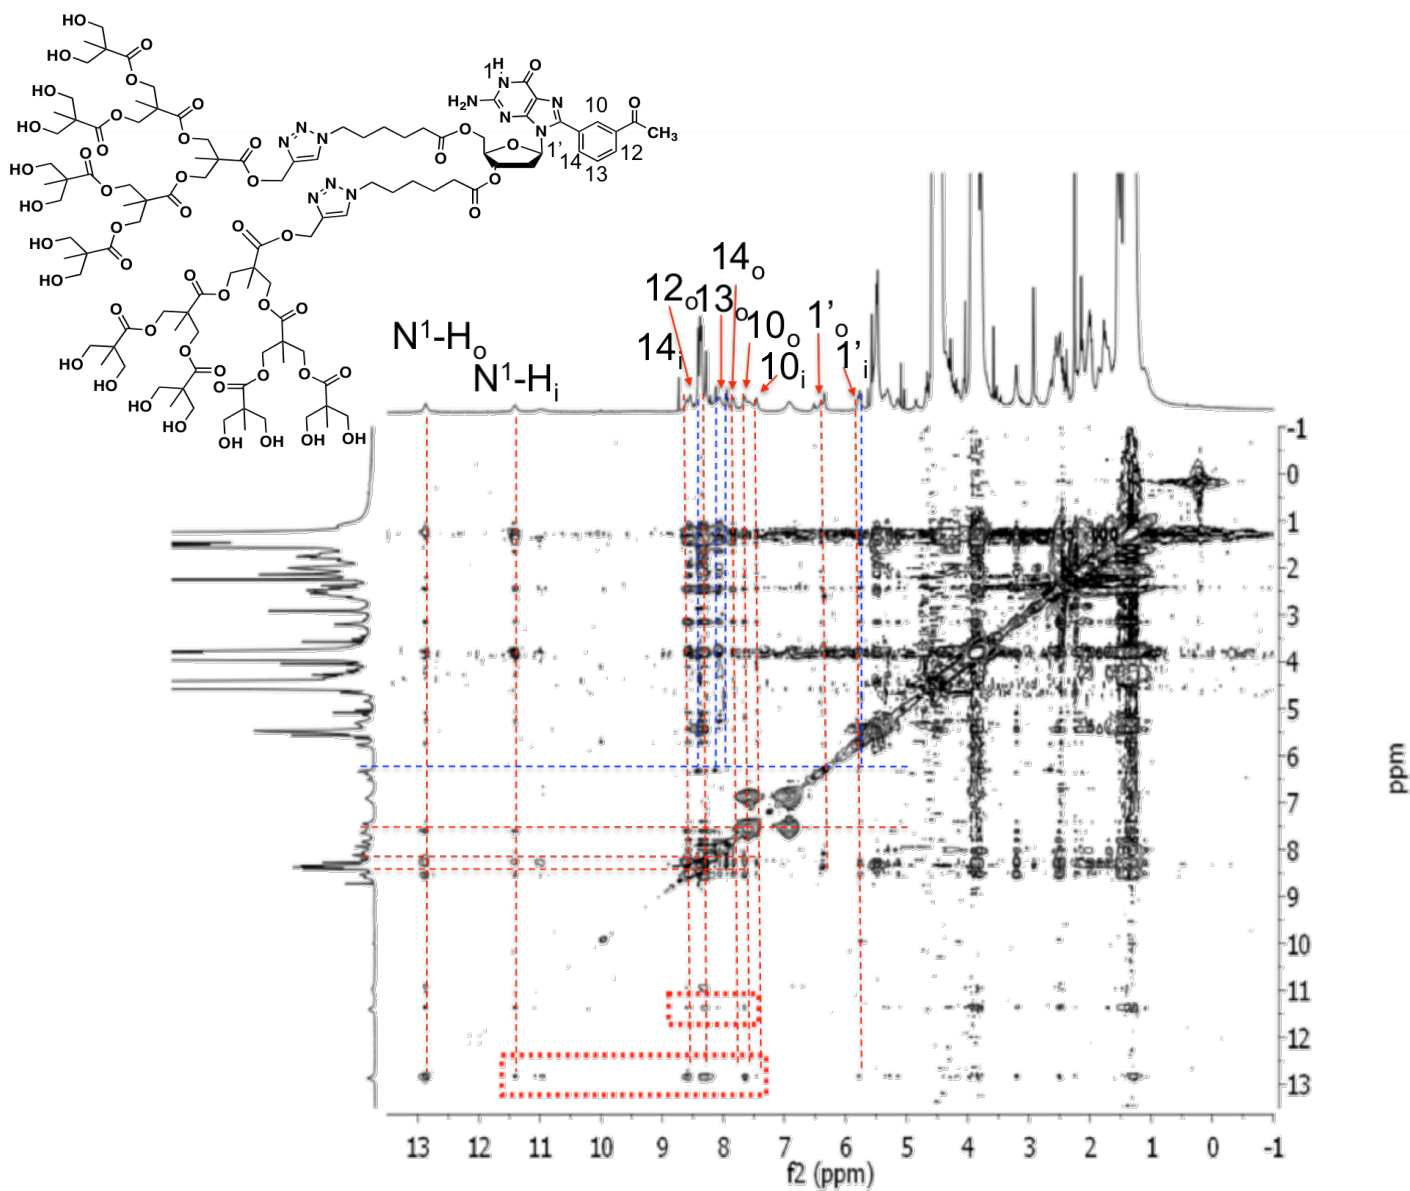

**Figure S5.** NOESY spectrum of **3<sub>16</sub>** (500 MHz;  $\tau_m = 500$  msec; H<sub>2</sub>O-D<sub>2</sub>O (9:1); 0.1 M PBS, pH 7.1; 3 M KI; 10 mM in **3**). The red lines show the correlations between the protons of the assembly; the blue lines show correlation between monomeric species; and red squares point to the signature cross peaks characteristic of hexadecameric assemblies formed by the **mAG** scaffold in aqueous media.<sup>1,2</sup>

## D. Dynamic Light Scattering (DLS) Data

**Table S1.** DLS raw data for **3<sub>16</sub>** with 99% LASER Power, 10 scans of 10 s each.

| Acq #          | Time (s) | Temp (C) | Intensity (Cnt/s) | R (nm)       | % PD         | MW-R (kDa) | Amp   | Baseline | SOS   |
|----------------|----------|----------|-------------------|--------------|--------------|------------|-------|----------|-------|
| 1              | 1568.3   | 25       | 5185610           | 2.7          | 23.8         | 18         | 0.146 | 1        | 0.509 |
| 2              | 1578.3   | 25       | 5114500           | 2.7          | 36.5         | 18         | 0.150 | 1        | 0.498 |
| 3              | 1588.3   | 25       | 5099330           | 2.6          | 20.7         | 17         | 0.150 | 1        | 0.425 |
| 4              | 1598.3   | 25       | 5181560           | 2.6          | 22.5         | 17         | 0.147 | 1        | 0.570 |
| 5              | 1608.3   | 25       | 5218710           | 2.7          | 36.7         | 18         | 0.143 | 1        | 0.541 |
| 6              | 1618.3   | 25       | 5234680           | 2.6          | 33.2         | 17         | 0.142 | 1        | 0.305 |
| 7              | 1628.3   | 25       | 5269420           | 2.7          | 15.2         | 18         | 0.140 | 1        | 0.318 |
| 8              | 1638.3   | 25       | 5266750           | 2.6          | 22.9         | 17         | 0.141 | 1        | 0.253 |
| 9              | 1648.3   | 25       | 5291180           | 2.7          | 30.2         | 18         | 0.149 | 1        | 0.786 |
| 10             | 1658.3   | 25       | 5245270           | 2.6          | 36.2         | 17         | 0.149 | 1        | 0.459 |
| <b>Average</b> |          |          |                   | <b>2.65</b>  | <b>27.79</b> |            |       |          |       |
| <b>StdDev</b>  |          |          |                   | <b>0.053</b> | <b>7.72</b>  |            |       |          |       |

**Graph S1.** Histogram of the size distributions for **3<sub>16</sub>**.

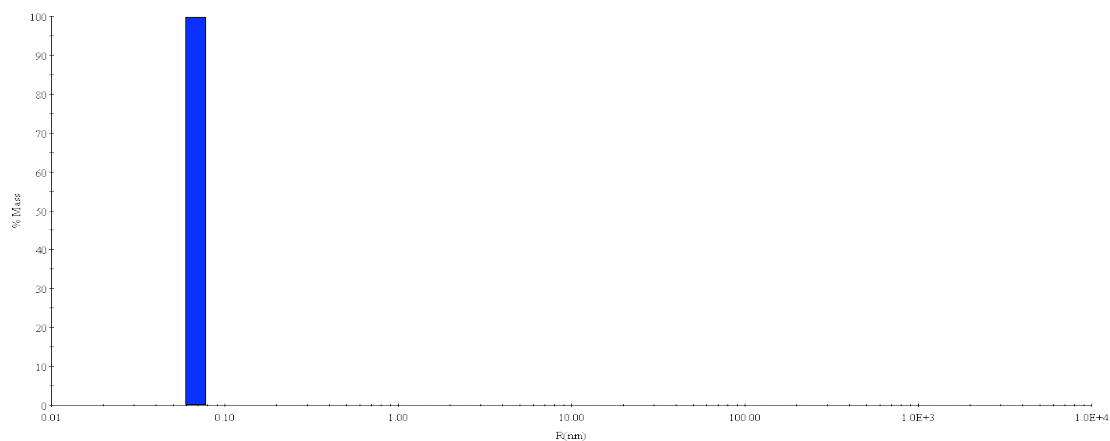



**Graph S2.** Size and signal intensity changes as function of the detection time for  $3_{16}$ .

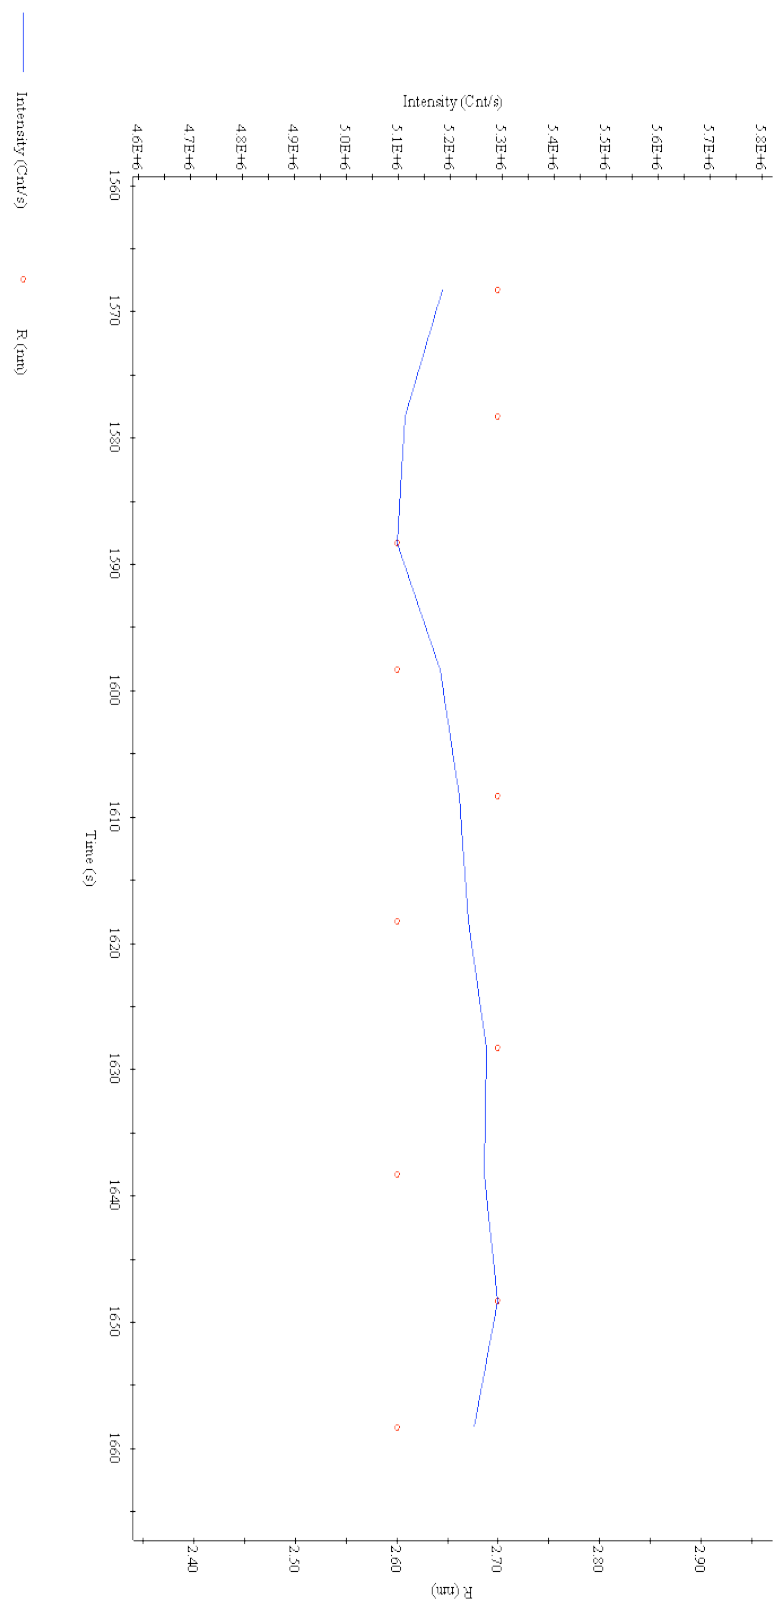

**Graph S3.** Correlation values for the data shown in Graphs S1-2.

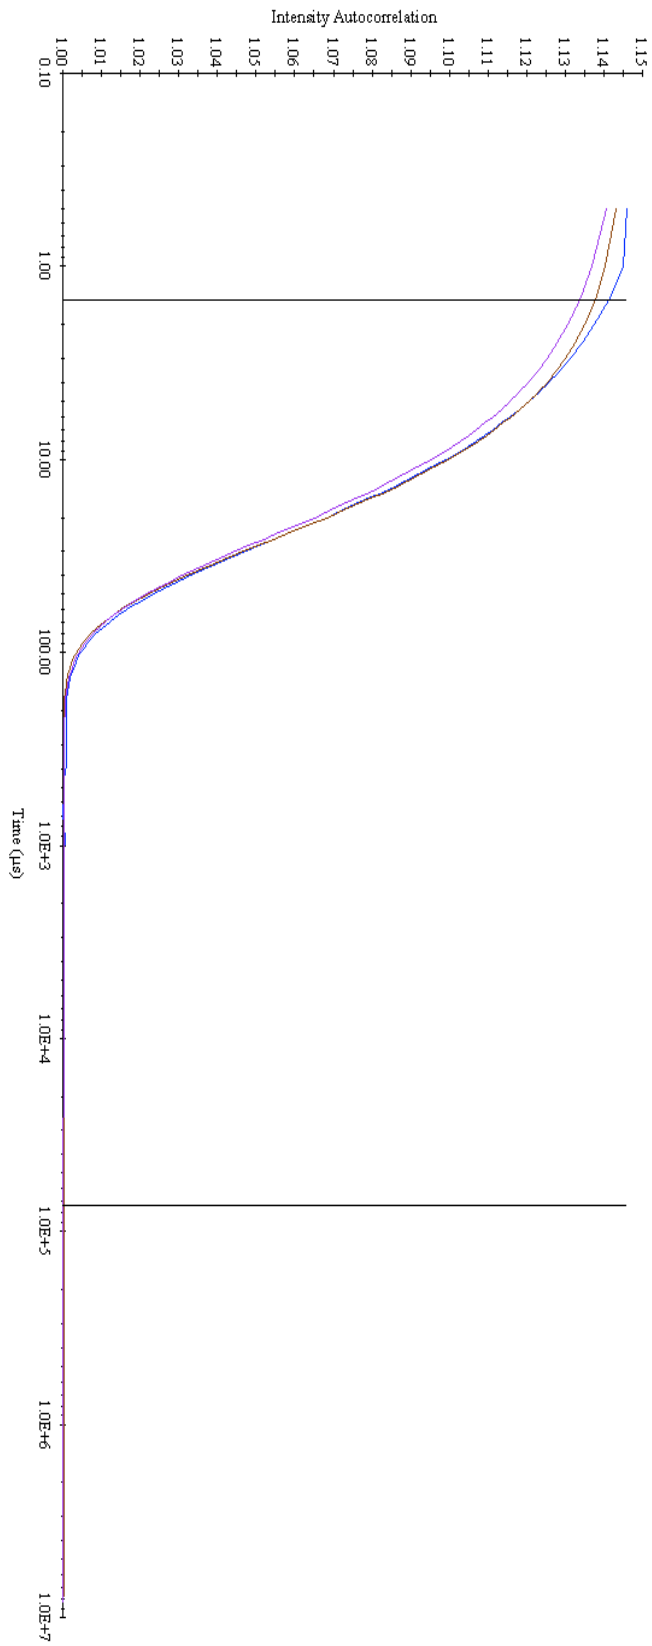

## E. Computational Analysis

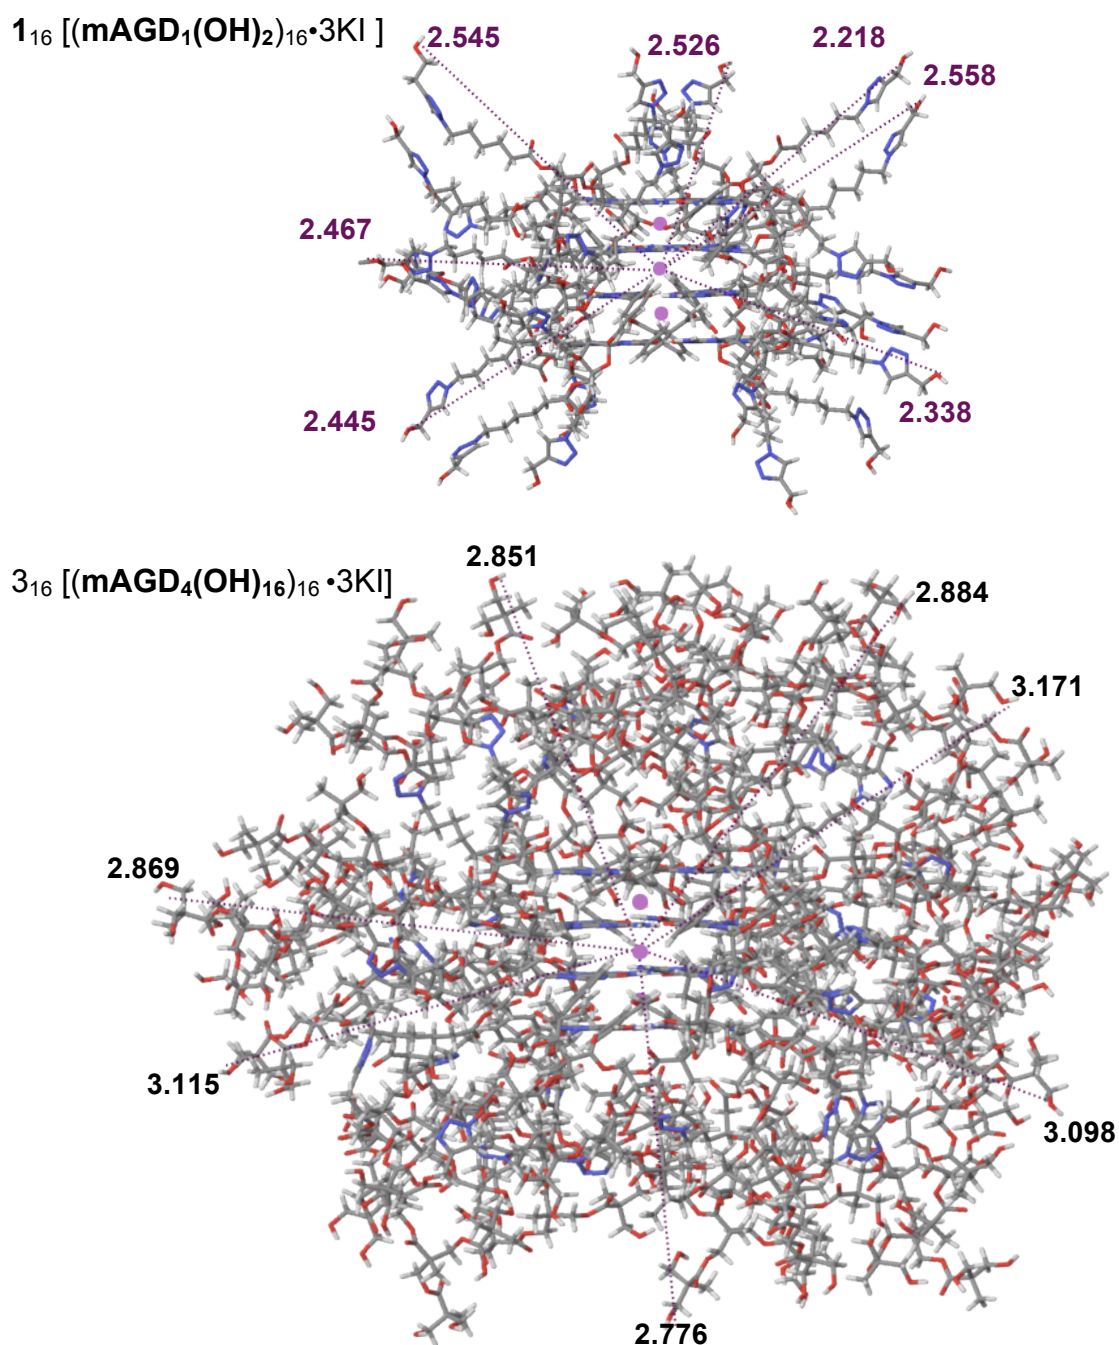

**Figure S6.** Hydrodynamic radii were determined using a molecular model of  $1_{16}$  and  $3_{16}$  as constructed using OPLS2005\* (MacroModel, Version 9.5, Maestro 8.0.315, Schrödinger, LLC, New York, NY, 2007) representing water as a continuum solvent. The purple spheres represent potassium cations.<sup>1</sup>

## F. $T_m$ calculation from VT-NMR data

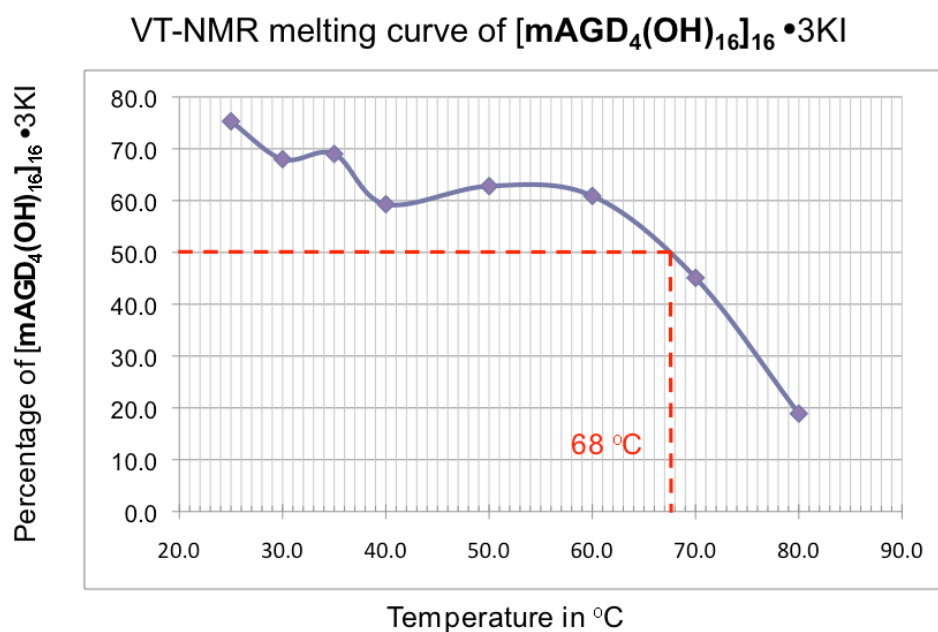

**Figure S7.** Melting curve of  $\mathbf{3}_{16}$  (10 mM in  $\mathbf{3}$ ) in  $\text{D}_2\text{O}$ - $\text{H}_2\text{O}$  (9:1), 0.1 M PBS, pH 7.1 and 3M KI constructed with VT-NMR. The average of the integrations of four peaks (corresponding to protons at: 8.0 ppm, 7.8 ppm, 7.6 ppm, and 6.5 ppm for the assembled specie and 8.2 ppm, 8.1 ppm, and 6.4 ppm for the monomer) were used to calculate the ration of  $\mathbf{3}_{16}$ : $\mathbf{3}$  with the  $T_m$  defined here as the temperature at which this ratio is 1:1. NOTE:  $[\text{mAGD}_x(\text{OH})_{2x}]_{16} \cdot 3\text{KI}$  refers to  $\mathbf{3}_{16}$  as stated in the main text (Ref. 23).

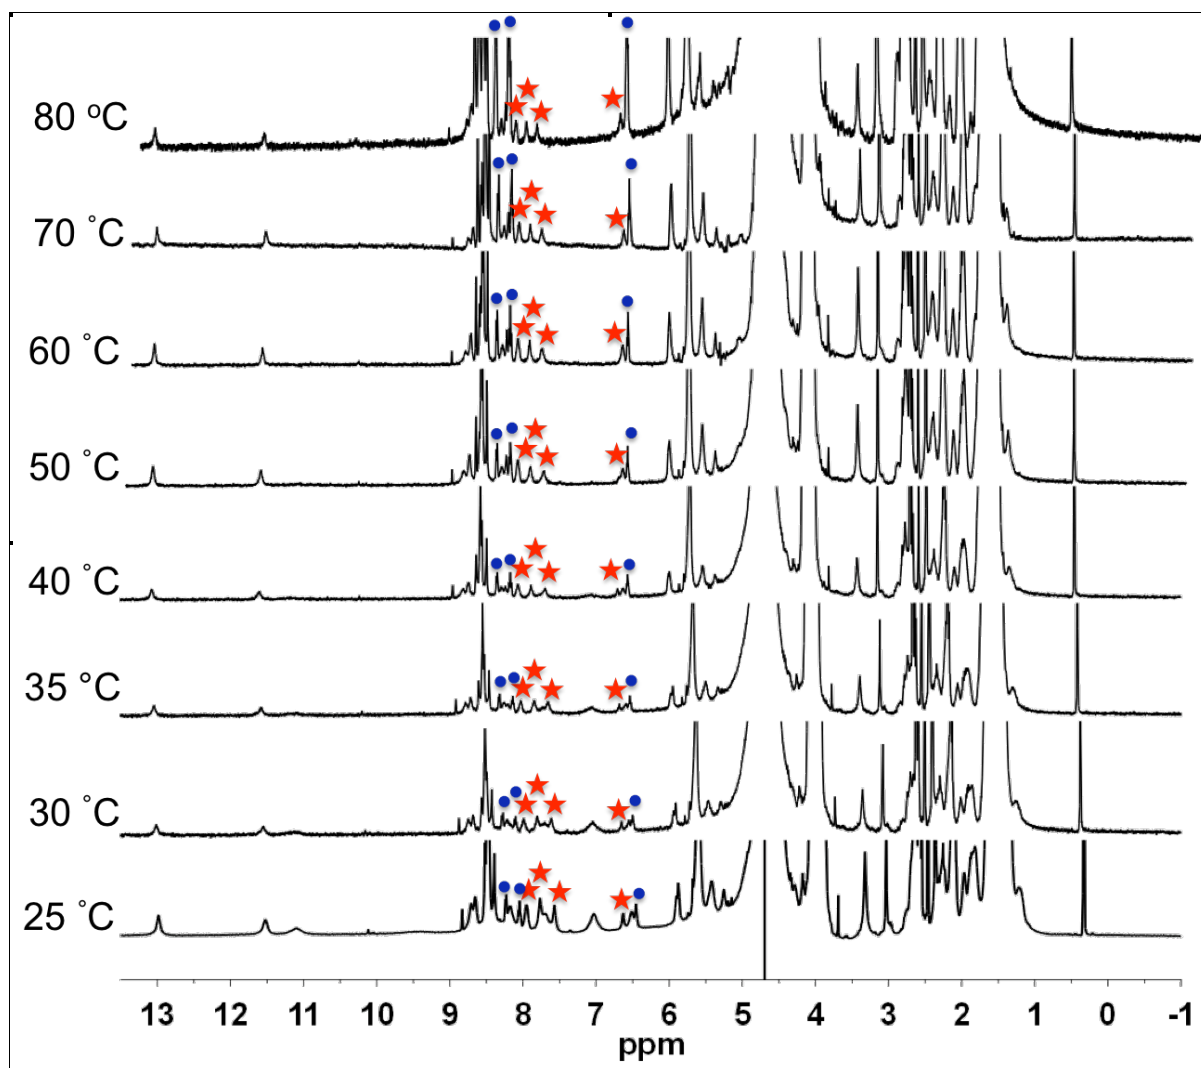

**Figure S8.** Variable temperature (VT)  $^1\text{H}$ -NMR (500 MHz) spectra for  $\mathbf{3}_{16}$  in  $\text{H}_2\text{O}$ - $\text{D}_2\text{O}$  (9:1; 10 mM in  $\mathbf{3}$ ; 3 M KI; 0.1 M PBS; pH 7.1). The amounts of  $\mathbf{3}_{16}$  as a function of temperature are (from bottom to top): 75%, 68%, 69%, 59%, 63%, 61%, 45%, and 19%. The percentage of assembly ( $\mathbf{3}_{16}$ ) were calculated from the average values obtained by integrating the marked peaks corresponding to  $\mathbf{3}_{16}$  (red stars, ★) and  $\mathbf{3}$  (blue circles, ●). This is a version of Figure 3 (from the main text) showing a wider spectral window (13.5 to -1 ppm).

**Table S2.** Integration values for assembled specie obtained from the peak integration of the VT-NMR experiments.

| <b>GQ Tetrad Proton</b> | <b>8.0 ppm</b><br>14 outer | <b>7.8 ppm</b><br>11 outer | <b>7.6 ppm</b><br>11 inner | <b>6.5 ppm</b><br>1' outer | <b>Average of Hexadecamer</b> |
|-------------------------|----------------------------|----------------------------|----------------------------|----------------------------|-------------------------------|
| <b>Temperature (°C)</b> | Integration                | Integration                | Integration                | Integration                |                               |
| 25.0                    | 1.79                       | 1.30                       | 1.30                       | 0.65                       | 2.52                          |
| 30.0                    | 1.18                       | 0.91                       | 0.58                       | 0.47                       | 1.57                          |
| 35.0                    | 1.32                       | 1.25                       | 0.80                       | 0.52                       | 1.95                          |
| 40.0                    | 1.08                       | 0.97                       | 0.53                       | 0.28                       | 1.43                          |
| 50.0                    | 1.22                       | 1.11                       | 0.50                       | 0.43                       | 1.63                          |
| 60.0                    | 1.10                       | 1.02                       | 0.53                       | 0.78                       | 1.72                          |
| 70.0                    | 0.64                       | 0.46                       | 0.37                       | 0.29                       | 0.88                          |
| 80.0                    | 0.18                       | 0.12                       | 0.11                       | 0.10                       | 0.26                          |

**Table S3.** Integration values for monomeric species obtained from the peak integration of the VT-NMR experiments and the fraction of hexadecamer in solution.

| <b>Monomer Proton</b>   | <b>8.2 ppm</b><br>13 | <b>8.1 ppm</b><br>14 | <b>6.4 ppm</b><br>1' | <b>Average of Monomer</b> | <b>Fraction of hexadecamer</b> |
|-------------------------|----------------------|----------------------|----------------------|---------------------------|--------------------------------|
| <b>Temperature (°C)</b> | Integration          | Integration          | Integration          |                           |                                |
| 25.0                    | 0.85                 | 1.00                 | 0.63                 | 0.827                     | 0.753                          |
| 30.0                    | 0.65                 | 1.00                 | 0.57                 | 0.740                     | 0.680                          |
| 35.0                    | 0.83                 | 1.00                 | 0.79                 | 0.873                     | 0.690                          |
| 40.0                    | 0.96                 | 1.00                 | 0.98                 | 0.980                     | 0.593                          |
| 50.0                    | 0.95                 | 1.00                 | 0.95                 | 0.967                     | 0.628                          |
| 60.0                    | 1.20                 | 1.00                 | 1.11                 | 1.103                     | 0.609                          |
| 70.0                    | 1.09                 | 1.00                 | 1.12                 | 1.070                     | 0.451                          |
| 80.0                    | 1.15                 | 1.00                 | 1.13                 | 1.093                     | 0.189                          |

## G. References

1. García-Arriaga, M., Hogley, G., Rivera, J.M., *J. Am. Chem. Soc.* **2008**, *130*, 10492–10493.
2. Betancourt, J.E., Rivera, J.M., *J. Am. Chem. Soc.* **2009**, *131*, 16666–16668.
